# Supplementary material for: Effect of Synthesis Temperature on the Size of ZnO Nanoparticles Derived from Pineapple Peel Extract and Antibacterial Activity of ZnO–Starch Nanocomposite Films
Source: MDPI journal article supplement (doi:10.3390/nano10061061), 2020-05-30
Supplement: s1 [file s1]

## **Supplementary Materials:**

### **Effect of Synthesis Temperature on the Size of ZnO Nanoparticles Derived from Pineapple Peel Extract and Antibacterial Activity of ZnO–Starch Nanocomposite Films**

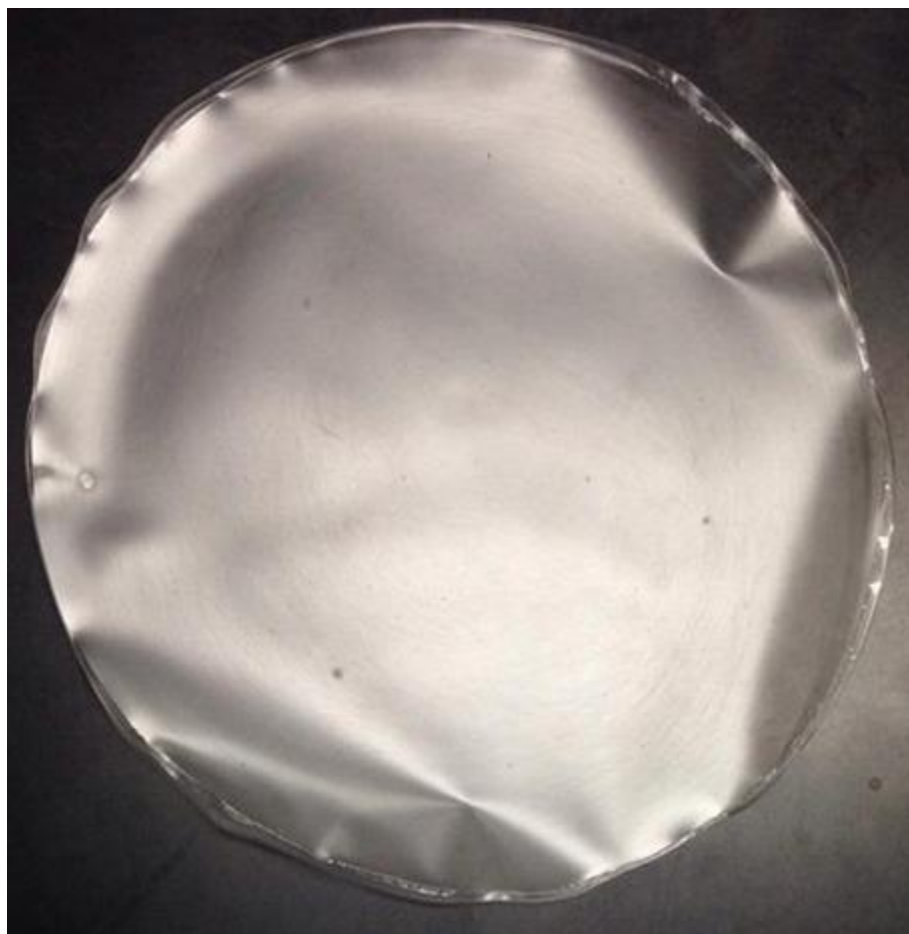

**Figure S1.** Photo image of starch film (0 wt.% ZnO which acts as a control film).
